# Supplementary material for: Metal- and ligand-substitution-induced changes in the kinetics and thermodynamics of hydrogen activation and hydricity in a dinuclear metal complex
Source: Royal Society of Chemistry journal article supplement (doi:10.1039/d4dt00361f), 2024-01-01
Supplement: d4dt00361f1.pdf [file d4dt00361f1.pdf]

## Supporting Information

### Metal- and ligand-substitution-induced changes in the kinetics and thermodynamics of hydrogen activation and hydricity in a dinuclear metal complex

Miho Isegawa

International Institute for Carbon-Neutral Energy Research (WPI-I<sup>2</sup>CNER), Kyushu University 744  
Moto-oka, Nishi-ku, Fukuoka 819-0395, Japan

\*E-mail: [isegawa.miho.169@m.kyushu-u.ac.jp](mailto:isegawa.miho.169@m.kyushu-u.ac.jp)

**Table S1.** Reaction energies of  $[M1M2(L2)] + H_2O \rightarrow [M1M2(H_2O)(L2)]$

|                     | Spin state |                           | Spin state | $\Delta G$     |
|---------------------|------------|---------------------------|------------|----------------|
| $[NiFe(CO)]^{2+}$   | S = 0      | $[NiFe(H_2O)(CO)]^{2+}$   | S = 0      | 7.3            |
| $[NiRu(CO)]^{2+}$   | S = 0      | $[NiRu(H_2O)(CO)]^{2+}$   | S = 0      | 16.2           |
| $[PdFe(CO)]^{2+}$   | S = 0      | $[PdFe(H_2O)(CO)]^{2+}$   | S = 0      | 12.9           |
| $[PdRu(CO)]^{2+}$   | S = 0      | $[PdRu(H_2O)(CO)]^{2+}$   | S = 0      | 8.8            |
| $[NiFe(CNMe)]^{2+}$ | S = 0      | $[NiFe(H_2O)(CNMe)]^{2+}$ | S = 0      | 11.3           |
| $[NiFe(NCS)]^+$     | S = 0      | $[NiFe(H_2O)(NCS)]^+$     | S = 1      | – <sup>a</sup> |

<sup>a</sup> H<sub>2</sub>O is unbound.

(a)  $[\text{NiRu}(\text{H}_2)(\text{CO})]^{2+}$

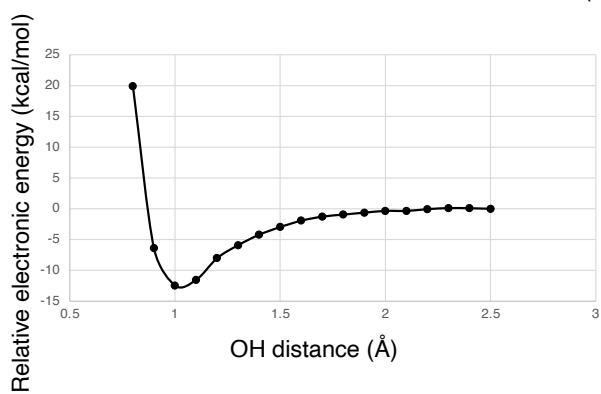

(b)  $[\text{PdFe}(\text{H}_2)(\text{CO})]^{2+}$

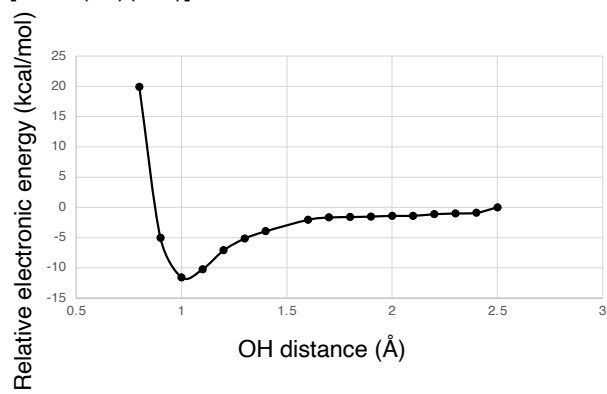

(c)  $[\text{PdRu}(\text{H}_2)(\text{CO})]^{2+}$

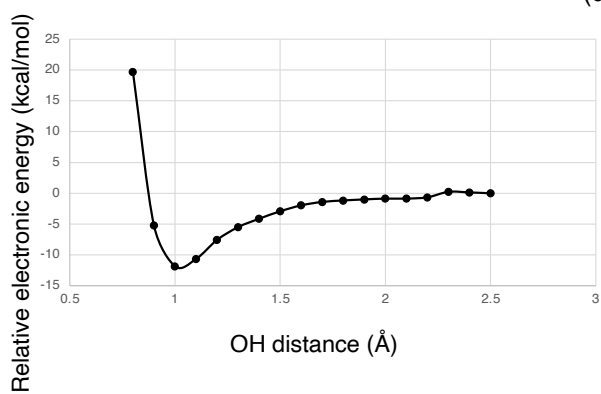

(d)  $[\text{NiFe}(\text{H}_2)(\text{CNMe})]^{2+}$

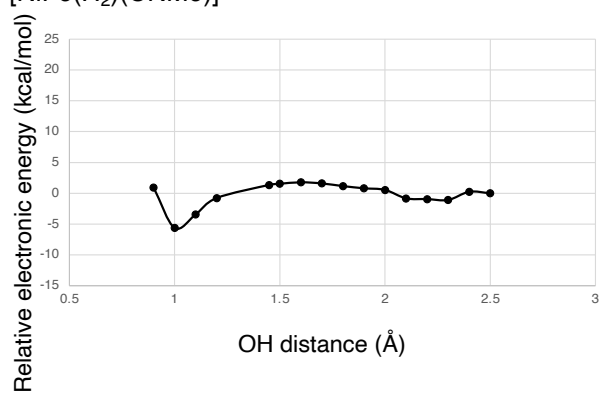

(e)  $[\text{NiFe}(\text{H}_2)\text{NCS}]^+$

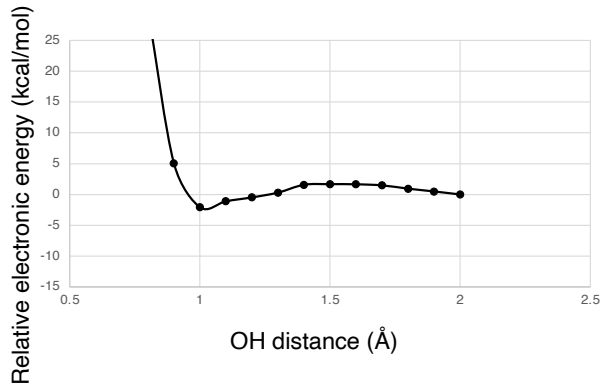

**Figure S1.** Relaxed potential energy surface scan for proton abstraction step by  $\text{CH}_3\text{COO}^-$  in  $\text{H}_2$  activation.

(a)  $[\text{NiRu}(\text{H}_2)(\text{CO})]^{2+}$

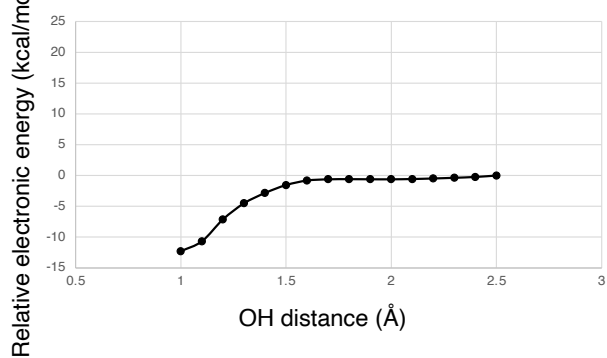

(b)  $[\text{PdFe}(\text{H}_2)(\text{CO})]^{2+}$

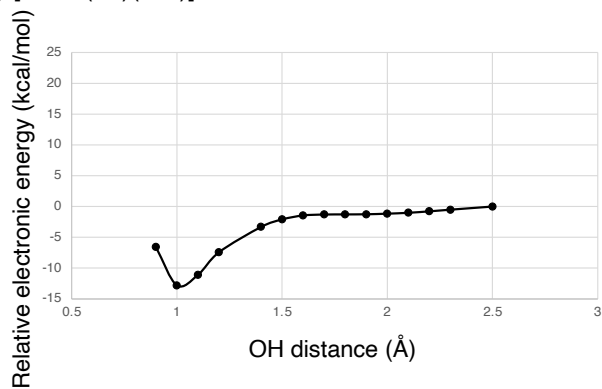

(c)  $[\text{PdRu}(\text{H}_2)(\text{CO})]^{2+}$

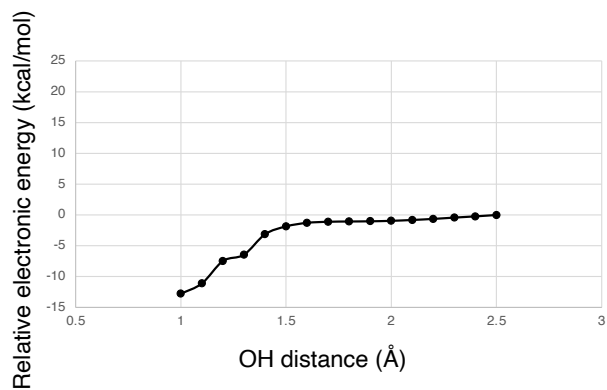

(d)  $[\text{NiFe}(\text{H}_2)(\text{CNMe})]^{2+}$

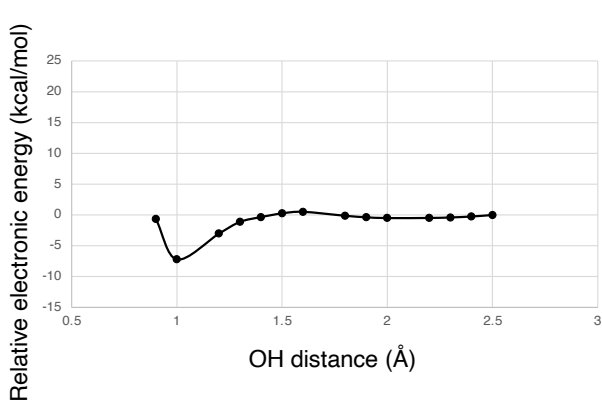

(e)  $[\text{NiFe}(\text{H}_2)\text{NCS}]^+$

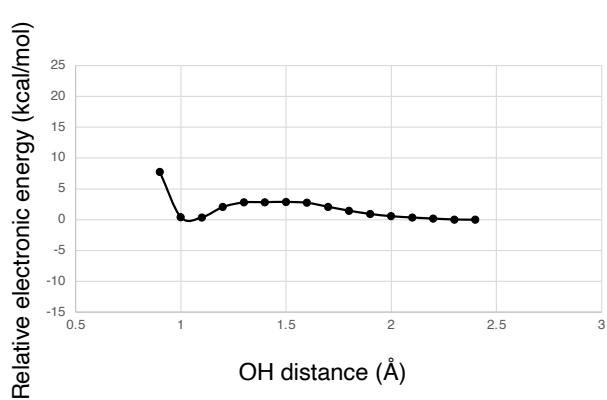

**Figure S2.** Relaxed potential energy surface scan for proton abstraction step by  $\text{HPO}_4^{2-}$  in  $\text{H}_2$  activation.

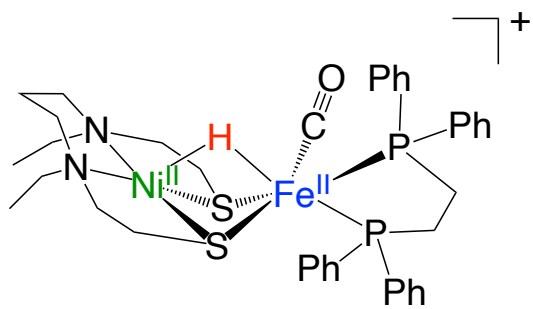

Bridging hydride complex

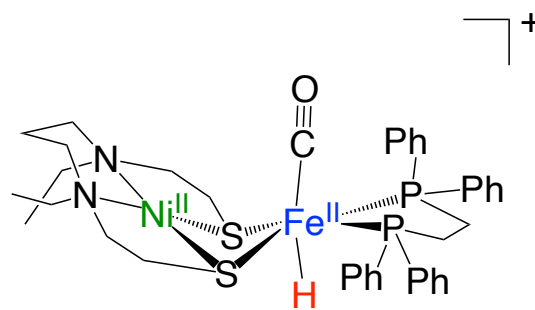

Terminal hydride complex

**Figure S3.** Isomers of NiFe hydride complexes.
